# Supplementary material
Source: Springer Nature journal article supplement (https://www.springermedizin.de/resource/supplementary/13045_2013_351_MOESM4_ESM.pdf/9661190)

**A**Unmutated *TP53*Mutated *TP53*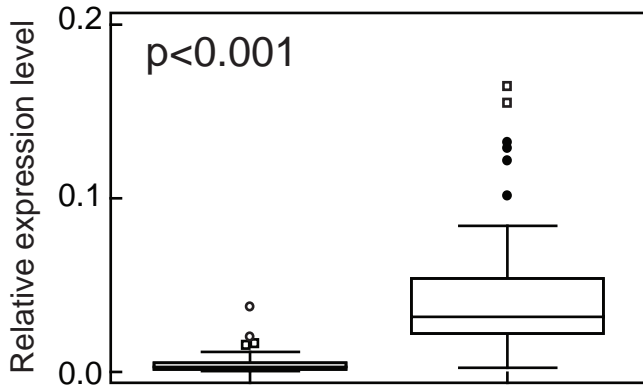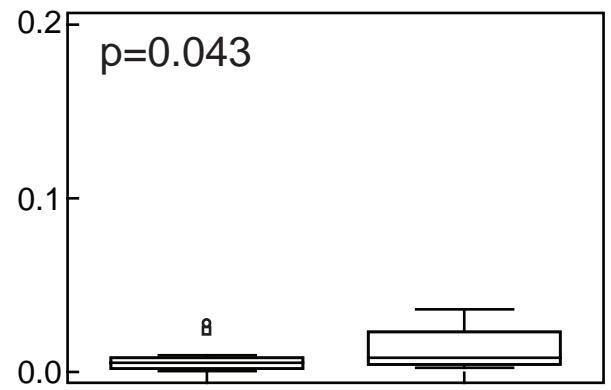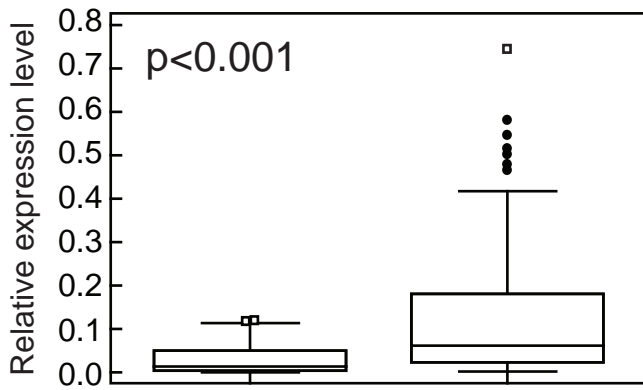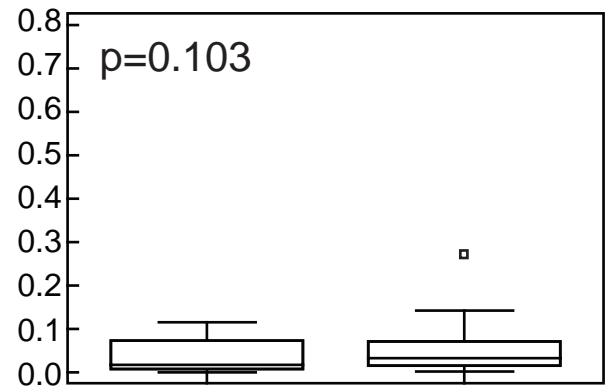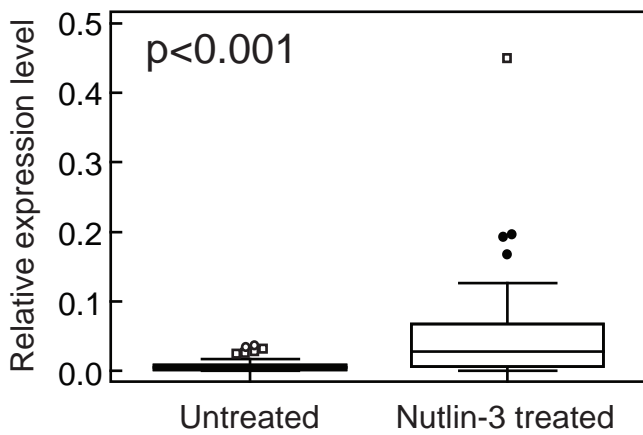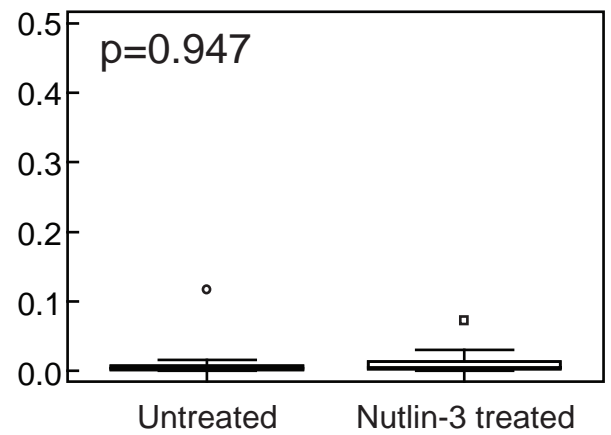**B**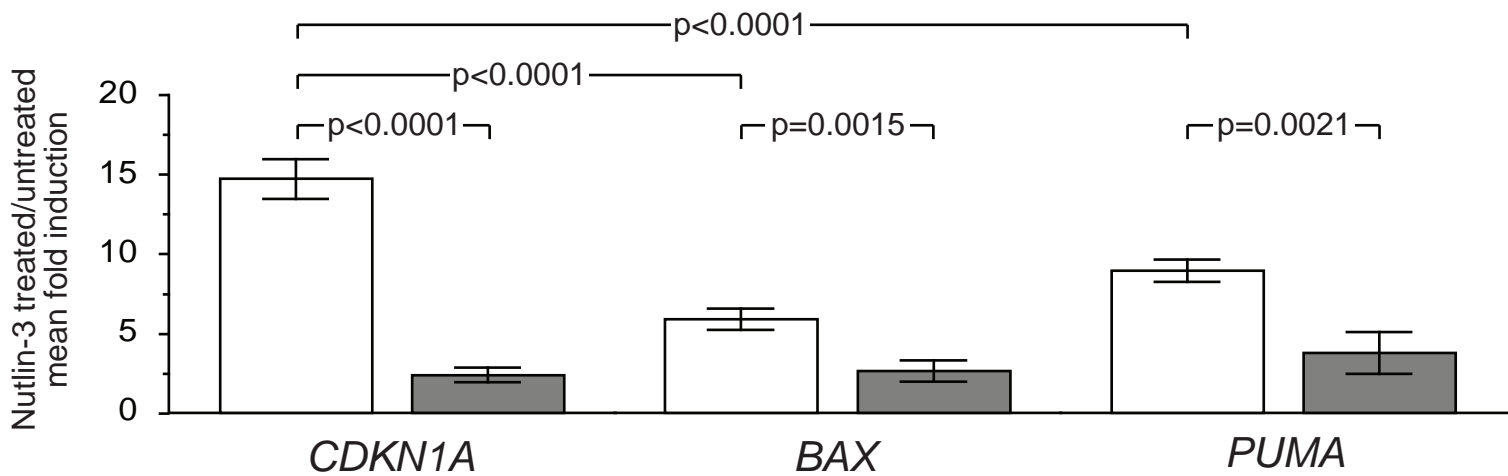

Supplement: MOESM4 [file 9661190]
